# Supplementary figures and images for: Effects of Sustained Competitive Employment on Psychiatric Hospitalizations and Quality of Life
Source: Atypon-hosted journal article supplement (doi:10.1176/appi.ps.201600083), 2017-02-01

**FIGURE 1.** Consort diagram: Progress through stages of the trial

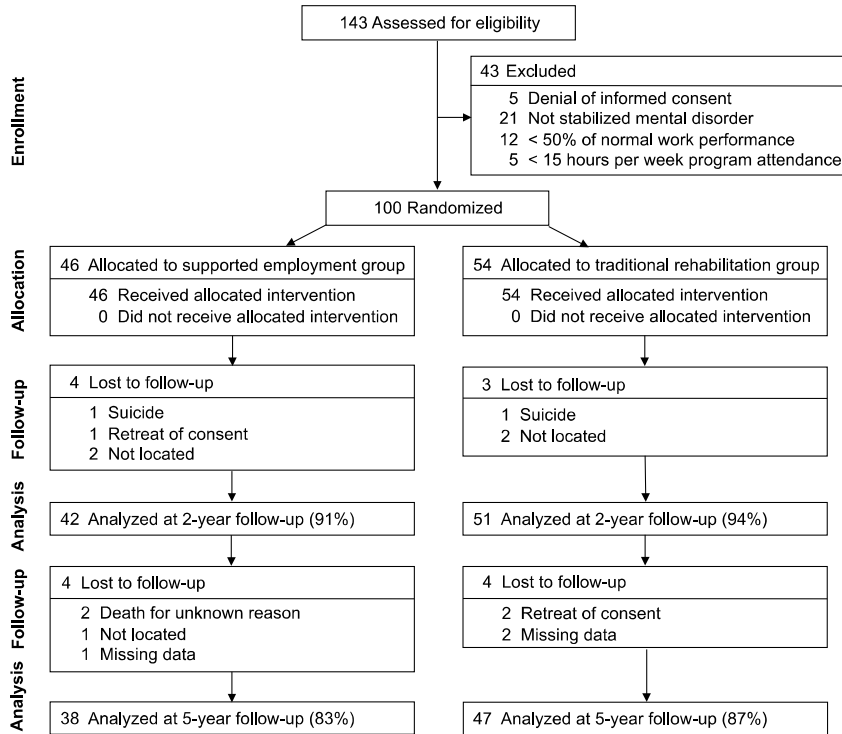

Supplement: appi.ps.201600083.ds001.pdf [file appi.ps.201600083.ds001.pdf]
